# Supplementary material for: Radiation Health Risk to Human Scavengers at Refuse Dumpsites in Calabar, Nigeria
Source: Research Square preprint supplement (doi:10.21203/rs.3.rs-3953413/v1), 2024-02-15
Supplement: Supplementary file 1 [file a4e52a825410d79b79feecec.docx]

Table 1: Background radiation dose rates (BRDR) in Calabar

Location BRD (µSv/hr) AEDR (mSv/yr)

Airport field 0.89 ± 0.03 1.71

UNICALa field 0.92 ± 0.06 1.77

CSCb field 0.90 ± 0.01 1.73

HWTIc field 0.98 ± 0.04 1.92

aUniversity of Calabar; bCalabar South Council; cHope Waddle Training Institute

Table 2: Radiation doses for waste dumps in Section A

Location Coordinates E (µSv/hr) AEDR (mSv/yr)

SA01 N4o55.24ꞌ E8o18.84ꞌ 0.12 ± 0.02 0.23

SA02 N4055.59ꞌ E8019.41ꞌ 0.11 ± 0.02 0.21

SA03 N4055.94ꞌ E8019.14ꞌ 0.15 ± 0.03 0.29

SA04 N4056.25ꞌ E8019.21ꞌ 0.12 ± 0.03 0.23

SA05 N4056.38ꞌ E8019.73ꞌ 0.10 ± 0.01 0.19

SA06 N4056.23ꞌ E8020.26ꞌ 0.13 ± 0.02 0.25

SA07 N4057.99ꞌ E8018.65ꞌ 0.10 ± 0.01 0.19

SA08 N4056.47ꞌ E8020.27ꞌ 0.10 ± 0.02 0.19

SA09 N4056.98ꞌ E8019.91ꞌ 0.11 ± 0.01 0.21

SA10 N4056.96ꞌ E8020.16ꞌ 0.13 ± 0.02 0.25

SA11 N4057.39ꞌ E8018.98ꞌ 0.13 ± 0.02 0.25

SA12 N4057.49ꞌ E8019.21ꞌ 0.12 ± 0.01 0.23

SA13 N4057.21ꞌ E8021.46ꞌ 0.14 ± 0.01 0.27

Table 3: Radiation dose rates for waste dumps in Section B

Location Coordinates E (µSv/hr) AEDR (mSv/yr)

SB01 N4o57.66ꞌ E8o20.68ꞌ 0.09 ± 0.02 0.17

SB02 N4o57.76ꞌ E8o19.74ꞌ 0.09 ± 0.01 0.17

SB03 N4o58.10ꞌ E8o21.59ꞌ 0.10 ± 0.02 0.19

SB04 N4o58.12ꞌ E8o20.75ꞌ 0.11 ± 0.02 0.21

SB05 N4o58.20ꞌ E8o21.45ꞌ 0.14 ± 0.03 0.27

SB06 N4o55.58ꞌ E8o20.48ꞌ 0.13 ± 0.01 0.25

SB07 N4o58.94ꞌ E8o19.95ꞌ 0.09 ± 0.01 0.17

SB08 N4o58.79ꞌ E8o20.13ꞌ 0.09 ± 0.01 0.17

SB09 N4o58.82ꞌ E8o20.74ꞌ 0.12 ± 0.02 0.23

SB10 N4o57.72ꞌ E8o19.42ꞌ 0.09 ± 0.01 0.17

SB11 N4o59.43ꞌ E8o21.29ꞌ 0.13 ± 0.02 0.25

SB12 N4o59.85ꞌ E8o20.34ꞌ 0.10 ± 0.01 0.19

SB13 N4o59.46ꞌ E8o19.63ꞌ 0.11 ± 0.02 0.21

SB14 N4o59.99ꞌ E8o19.82ꞌ 0.12 ± 0.02 0.23

Table 4: Radiation dose rates for waste dumps in Section C

Location Coordinates E (µSv/hr) AEDR (mSv/yr)

SC01 N5o06.21ꞌ E8o19.91ꞌ 0.08 ± 0.02 0.15

SC02 N5o06.21ꞌ E8o20.41ꞌ 0.11 ± 0.01 0.21

SC03 N5o05.93ꞌ E8o20.56ꞌ 0.10 ± 0.02 0.19

SC04 N5o05.87ꞌ E8o20.49ꞌ 0.10 ± 0.01 0.19

SC05 N5o01.12ꞌ E8o19.35ꞌ 0.14 ± 0.02 0.27

SC06 N5o01.13ꞌ E8o20.21ꞌ 0.09 ± 0.02 0.17

SC07 N5o01.97ꞌ E8o20.34ꞌ 0.09 ± 0.01 0.17

SC08 N5o01.52ꞌ E8o20.51ꞌ 0.10 ± 0.01 0.19

SC09 N5o01.53ꞌ E8o20.68ꞌ 0.09 ± 0.01 0.17

SC10 N5o02.18ꞌ E8o21.92ꞌ 0.19 ± 0.01 0.36

SC11 N5o02.84ꞌ E8o21.42ꞌ 0.10 ± 0.01 0.19

SC12 N5o03.27ꞌ E8o21.33ꞌ 0.11 ± 0.02 0.21

SC13 N5o01.18ꞌ E8o19.13ꞌ 0.10 ± 0.02 0.19

Table 5: Lifetime attributed cancer incident and mortality for waste dumps in Section A

Location AEDR (mSv/yr) LACIm LACMm LACIf LACMf

SA01 0.23 70 39 99 55

SA02 0.21 64 36 90 50

SA03 0.29 89 49 125 69

SA04 0.23 70 39 99 55

SA05 0.19 58 32 82 45

SA06 0.25 76 43 107 60

SA07 0.19 58 32 82 45

SA07 0.19 58 32 82 45

SA07 0.21 64 36 90 50

SA08 0.25 76 43 107 60

SA09 0.25 76 43 107 60

SA10 0.23 70 39 99 55

SA11 0.27 83 46 116 65

Table 6: Lifetime attributed cancer incidence and mortality for waste dumps in Section B

Location AEDR (mSv/yr) LACIm LACMm LACIf LACMf

SB01 0.17 52 29 73 41

SB02 0.17 52 29 73 41

SB03 0.19 58 32 82 45

SB04 0.21 64 36 90 50

SB05 0.27 83 46 116 65

SB06 0.25 76 43 107 60

SB07 0.17 52 29 73 41

SB08 0.17 52 29 73 41

SB09 0.23 70 39 99 55

SB10 0.17 52 29 73 41

SB11 0.25 76 43 107 60

SB12 0.19 58 32 82 45

SB13 0.21 64 36 90 50

SB14 0.23 70 39 99 55

Table 7: Lifetime attributed cancer incidence and mortality for waste dumps in Section C

Location AEDR (mSv/yr) LACIm LACMm LACIf LACMf

SC01 0.15 46 26 64 36

SC02 0.21 64 36 90 50

SC03 0.19 58 32 82 45

SC04 0.19 58 32 82 45

SC05 0.27 83 46 116 65

SC06 0.17 52 29 73 41

SC07 0.17 52 29 73 41

SC08 0.19 58 32 82 45

SC09 0.17 52 29 73 41

SC10 0.36 110 61 154 86

SC11 0.19 58 32 82 45

SC12 0.21 64 36 90 50

SC13 0.19 58 32 82 45

Table 8: Lifetime attributed cancer mortality calculated using equations [8]

Location LACMm LACMm(E) LACMf LACMf(E)

SA01 39 39.03 55 55.49

SA02 36 35.71 50 50.47

SA03 49 49.36 69 70.00

SA04 39 39.03 55 55.49

SA05 32 32.38 45 46.00

SA06 43 42.37 60 59.95

SA07 32 32.38 45 46.00

SA07 32 32.38 45 46.00

SA07 36 35.71 50 50.47

SA08 43 42.37 60 59.95

SA09 43 42.37 60 59.95

SA10 39 39.03 55 55.49

SA11 46 46.24 65 64.97
